# Supplementary material for: PPARγ Transcription Deficiency Exacerbates High-Fat Diet-Induced Adipocyte Hypertrophy and Insulin Resistance in Mice
Source: PubMed Central journal article supplement (PMC7466717; doi:10.3389/fphar.2020.01285), 2020-08-19
Supplement: DataSheet_1.pdf [file DataSheet_1.pdf]

# Supplementary Figure 1

```

PPARg1 : ATGG-----*-----20-----*-----40-----*-----60-----*-----80----- : 4
PPARg2 : ATGGGTGAAACTCTGGGAGATTCTCCTGTGACCCAGAGCATGGTGCCTTCGCTGATGCCTGCTATGAGCACTTCACAAGAA : 85
      ATGG

      *-----100-----*-----120-----*-----140-----*-----160-----*
PPARg1 : -----TTGACACAGAGATGCCATTCTGGCCCACTTCGGAATCAGCTCTGGACCTCCCGTATGGAAGACCACTC : 80
PPARg2 : TTACCATGGTTGACACAGAGATGCCATTCTGGCCCACTTCGGAATCAGCTCTGGACCTCCCGTATGGAAGACCACTC : 170
      TTGACACAGAGATGCCATTCTGGCCCACTTCGGAATCAGCTCTGGACCTCCCGTATGGAAGACCACTC

      *-----180-----*-----200-----*-----220-----*-----240-----*
PPARg1 : GCATTCCTTTGACATCAAGCCCTTTACCAAGTTGATTCTCCAGCATTTCTGCTCCACACTATGAAGACATTCATTCAAGA : 165
PPARg2 : GCATTCCTTTGACATCAAGCCCTTTACCAAGTTGATTCTCCAGCATTTCTGCTCCACACTATGAAGACATTCATTCAAGA : 255
      GCATTCCTTTGACATCAAGCCCTTTACCAAGTTGATTCTCCAGCATTTCTGCTCCACACTATGAAGACATTCATTCAAGA

      *-----260-----*-----280-----*-----300-----*-----320-----*-----340-----*
PPARg1 : GCTGACCCAATGGTGTCTGATTACAAATATGACCTGAAGCTCCAAGATACCAAAGTGCATCAAAGTAGAACCTCTCCAC : 250
PPARg2 : GCTGACCCAATGGTGTCTGATTACAAATATGACCTGAAGCTCCAAGATACCAAAGTGCATCAAAGTAGAACCTCTCCAC : 340
      GCTGACCCAATGGTGTCTGATTACAAATATGACCTGAAGCTCCAAGATACCAAAGTGCATCAAAGTAGAACCTCTCCAC

      *-----360-----*-----380-----*-----400-----*-----420-----*
PPARg1 : CTTATTATTCTGAAAAGACCCAGCTCTACAACAGGCCCTCATGAAGAACCTTCTAACCCTCCATGAGTGGCCGAGTCTG : 335
PPARg2 : CTTATTATTCTGAAAAGACCCAGCTCTACAACAGGCCCTCATGAAGAACCTTCTAACCCTCCATGAGTGGCCGAGTCTG : 425
      CTTATTATTCTGAAAAGACCCAGCTCTACAACAGGCCCTCATGAAGAACCTTCTAACCCTCCATGAGTGGCCGAGTCTG

      *-----440-----*-----460-----*-----480-----*-----500-----*
PPARg1 : TGGGATAAAGCATCAGGCTTCCACTATGGAGTTCACTGCTTGAAGGATGCAAGGGTTTTTTCCGAAGAACCATCCGATTGAAG : 420
PPARg2 : TGGGATAAAGCATCAGGCTTCCACTATGGAGTTCACTGCTTGAAGGATGCAAGGGTTTTTTCCGAAGAACCATCCGATTGAAG : 510
      TGGGATAAAGCATCAGGCTTCCACTATGGAGTTCACTGCTTGAAGGATGCAAGGGTTTTTTCCGAAGAACCATCCGATTGAAG

      *-----520-----*-----540-----*-----560-----*-----580-----*
PPARg1 : CTTATTATTGATAGGTGTGATCTTAACTGCCGGATCCACAAAAAAGTAGAAAATAATGTCAGTACTGTCGGTTTCAGAAGTGC : 505
PPARg2 : CTTATTATTGATAGGTGTGATCTTAACTGCCGGATCCACAAAAAAGTAGAAAATAATGTCAGTACTGTCGGTTTCAGAAGTGC : 595
      CTTATTATTGATAGGTGTGATCTTAACTGCCGGATCCACAAAAAAGTAGAAAATAATGTCAGTACTGTCGGTTTCAGAAGTGC

      *-----600-----*-----620-----*-----640-----*-----660-----*-----680-----*
PPARg1 : TTGCTGTGGGGATGCTCTCAAAATGCCATCAGGTTTGGGCGGATGCCACAGGCCGAGAAGGAGAAGCTGTTGGCGGAGATCTCCAG : 590
PPARg2 : TTGCTGTGGGGATGCTCTCAAAATGCCATCAGGTTTGGGCGGATGCCACAGGCCGAGAAGGAGAAGCTGTTGGCGGAGATCTCCAG : 680
      TTGCTGTGGGGATGCTCTCAAAATGCCATCAGGTTTGGGCGGATGCCACAGGCCGAGAAGGAGAAGCTGTTGGCGGAGATCTCCAG

      *-----700-----*-----720-----*-----740-----*-----760-----*
PPARg1 : TGATATCGACCAGCTGAACCCAGAGTCTGCTGATCTGCGAGCCCTGGCAAAGCATTTGTATGACTCATACATAAAGTCTCCCG : 675
PPARg2 : TGATATCGACCAGCTGAACCCAGAGTCTGCTGATCTGCGAGCCCTGGCAAAGCATTTGTATGACTCATACATAAAGTCTCCCG : 765
      TGATATCGACCAGCTGAACCCAGAGTCTGCTGATCTGCGAGCCCTGGCAAAGCATTTGTATGACTCATACATAAAGTCTCCCG

      *-----780-----*-----800-----*-----820-----*-----840-----*
PPARg1 : CTGACCAAAGCCAAAGCGAGGGCGATCTTGACAGGAAGACAACGGACAATAACCATTTGTATCTACGACATGAATTCCTTAA : 760
PPARg2 : CTGACCAAAGCCAAAGCGAGGGCGATCTTGACAGGAAGACAACGGACAATAACCATTTGTATCTACGACATGAATTCCTTAA : 850
      CTGACCAAAGCCAAAGCGAGGGCGATCTTGACAGGAAGACAACGGACAATAACCATTTGTATCTACGACATGAATTCCTTAA

      *-----860-----*-----880-----*-----900-----*-----920-----*
PPARg1 : TGATGGGAGAAGATAAATCAAGTTCAAACATATCACCCCTTGCAGGAGCAGAGCAAAGAGGTGGCCATCCGAATTTTCAAGG : 845
PPARg2 : TGATGGGAGAAGATAAATCAAGTTCAAACATATCACCCCTTGCAGGAGCAGAGCAAAGAGGTGGCCATCCGAATTTTCAAGG : 935
      TGATGGGAGAAGATAAATCAAGTTCAAACATATCACCCCTTGCAGGAGCAGAGCAAAGAGGTGGCCATCCGAATTTTCAAGG

      *-----940-----*-----960-----*-----980-----*-----1000-----*-----1020-----*
PPARg1 : GTGCCAGTTTCGATCCGTAGAAGCCGTGCAAGAGATCACAGAGTATGCCAAAAATATCCCTGGTTTCATTAACCTTGATTTGAAT : 930
PPARg2 : GTGCCAGTTTCGATCCGTAGAAGCCGTGCAAGAGATCACAGAGTATGCCAAAAATATCCCTGGTTTCATTAACCTTGATTTGAAT : 1020
      GTGCCAGTTTCGATCCGTAGAAGCCGTGCAAGAGATCACAGAGTATGCCAAAAATATCCCTGGTTTCATTAACCTTGATTTGAAT

      *-----1040-----*-----1060-----*-----1080-----*-----1100-----*
PPARg1 : GACCAAGTGACTCTGCTCAAGTATGGTGTCCATGAGATCATCTACAGATGCTGGCCTCCCTGATGAATAAAGATGGAGTCCCTCA : 1015
PPARg2 : GACCAAGTGACTCTGCTCAAGTATGGTGTCCATGAGATCATCTACAGATGCTGGCCTCCCTGATGAATAAAGATGGAGTCCCTCA : 1105
      GACCAAGTGACTCTGCTCAAGTATGGTGTCCATGAGATCATCTACAGATGCTGGCCTCCCTGATGAATAAAGATGGAGTCCCTCA

      *-----1120-----*-----1140-----*-----1160-----*-----1180-----*
PPARg1 : TCTCAGAGGGCCAAGGATTCATGACCAGGGAGTTCCTCAAAAGCCTGCGGAAGCCCTTTGGTGACTTTATGGAGCCTAAGTTTGA : 1100
PPARg2 : TCTCAGAGGGCCAAGGATTCATGACCAGGGAGTTCCTCAAAAGCCTGCGGAAGCCCTTTGGTGACTTTATGGAGCCTAAGTTTGA : 1190
      TCTCAGAGGGCCAAGGATTCATGACCAGGGAGTTCCTCAAAAGCCTGCGGAAGCCCTTTGGTGACTTTATGGAGCCTAAGTTTGA

      *-----1200-----*-----1220-----*-----1240-----*-----1260-----*
PPARg1 : GTTTGCTGTGAAGTTCATGCACTGGAATTAGATGACAGTACTGGCTATATTTATAGCTGTCATTATTTCTCAGTGGAGACCCG : 1185
PPARg2 : GTTTGCTGTGAAGTTCATGCACTGGAATTAGATGACAGTACTGGCTATATTTATAGCTGTCATTATTTCTCAGTGGAGACCCG : 1275
      GTTTGCTGTGAAGTTCATGCACTGGAATTAGATGACAGTACTGGCTATATTTATAGCTGTCATTATTTCTCAGTGGAGACCCG

      *-----1280-----*-----1300-----*-----1320-----*-----1340-----*-----1360-----*
PPARg1 : CCAGGCTTGCTGAACGTGAAGCCCATCGAGGACATCCAAGACAACCTGCTGCAGGCCCTGGAAGTGCAGCTCAAGCTGAATCAC : 1270
PPARg2 : CCAGGCTTGCTGAACGTGAAGCCCATCGAGGACATCCAAGACAACCTGCTGCAGGCCCTGGAAGTGCAGCTCAAGCTGAATCAC : 1360
      CCAGGCTTGCTGAACGTGAAGCCCATCGAGGACATCCAAGACAACCTGCTGCAGGCCCTGGAAGTGCAGCTCAAGCTGAATCAC

      *-----1380-----*-----1400-----*-----1420-----*-----1440-----*
PPARg1 : CAGAGTCTCTCAGCTGTTCCGCAAGGTGCTCCAGAAGATGACAGACCTCAGGCAGATCGTCCACAGAGCACCTGCAGCTACTGCA : 1355
PPARg2 : CAGAGTCTCTCAGCTGTTCCGCAAGGTGCTCCAGAAGATGACAGACCTCAGGCAGATCGTCCACAGAGCACCTGCAGCTACTGCA : 1445
      CAGAGTCTCTCAGCTGTTCCGCAAGGTGCTCCAGAAGATGACAGACCTCAGGCAGATCGTCCACAGAGCACCTGCAGCTACTGCA

      *-----1460-----*-----1480-----*-----1500-----*
PPARg1 : TGTGATCAAGAAGACAGAGACAGACATGAGCCTTCAACCCCTGCTCCAGGAGATCTACAAGGACTTGTATTAG : 1428
PPARg2 : TGTGATCAAGAAGACAGAGACAGACATGAGCCTTCAACCCCTGCTCCAGGAGATCTACAAGGACTTGTATTAG : 1518
      TGTGATCAAGAAGACAGAGACAGACATGAGCCTTCAACCCCTGCTCCAGGAGATCTACAAGGACTTGTATTAG
  
```

Supplementary Figure 1. The alignment of the CDS sequences of PPARγ1 (Genbank# NM\_001127330.2) and PPARγ2 (Genbank# NM\_011146.3).

## Supplementary Figure 2

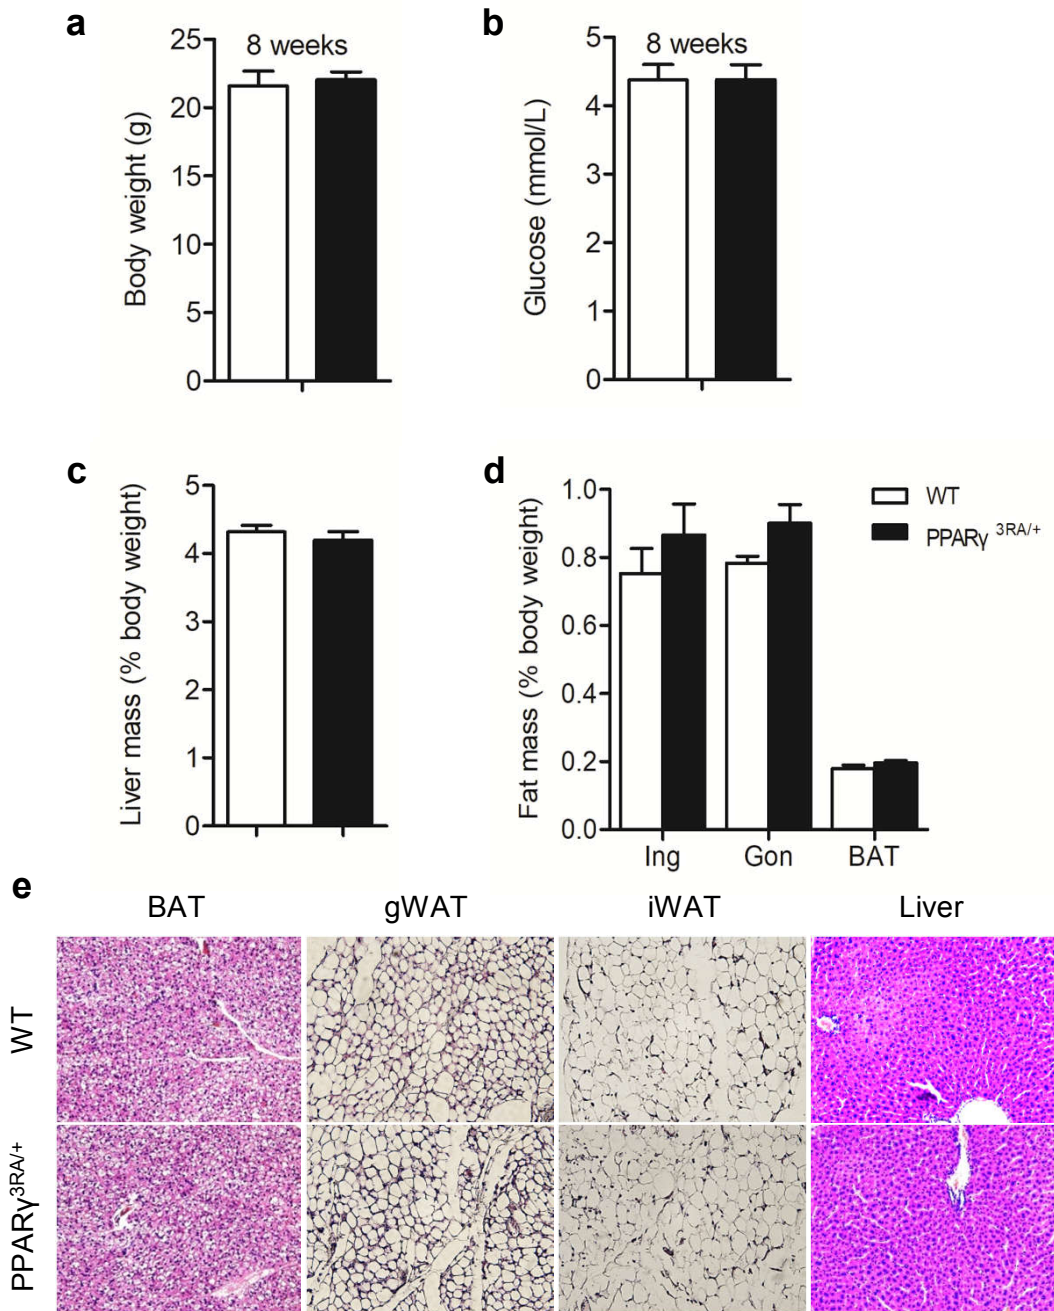

**Supplementary Figure 2. Phenotype of PPAR $\gamma^{3RA/+}$  and wild type (WT) littermates under chow diet.** Male mice were fed with normal chow diet to 8 weeks old. (a) Body weight. (b) Fasting blood glucose level. (c) Liver/body weight ratio. (d) Fat/body weight ratio. (e) Representative H&E staining of the brown adipose tissue (BAT), gonadal white fat (gWAT), inguinal white fat (iWAT) and liver sections. n=12 per group. Students t-test. A P-value less than or equal to 0.05 is considered statistically significant.

## Supplementary Figure 3

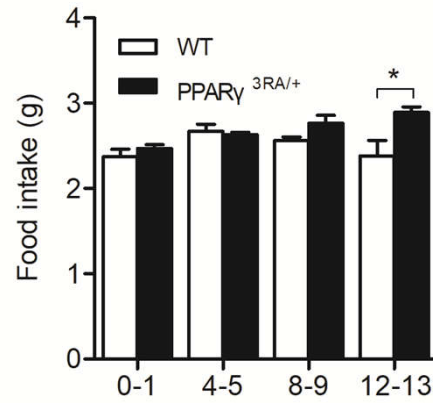

**Supplementary Figure 3. Food intake of mice.** After fed with chow diet to 8-week old, PPAR $\gamma^{3RA/+}$  and wild type (WT) littermates were put to HFD for 15 weeks. The figure showed the HFD food intake of mice at different time course. n=12 per group. Students t-test. \*P<0.05.

## Supplementary Figure 4

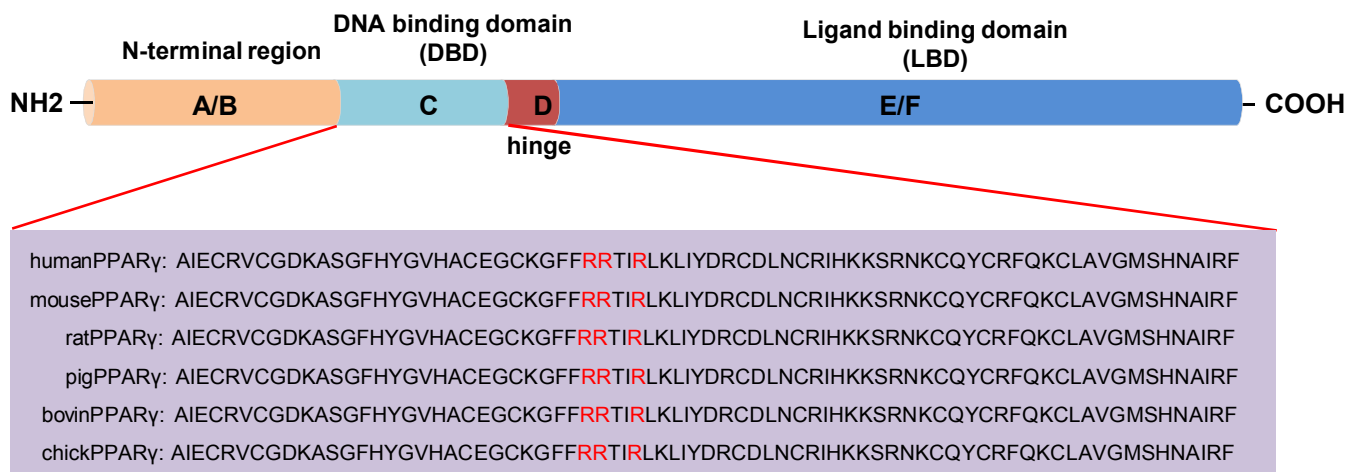

**Supplementary Figure 4. Alignment of PPAR $\gamma$  DBD sequence in different species.** Domains of nuclear receptors were shown. The mutated three arginine (R) residues were highlighted in red.

**Supplementary Table 1.** Sequences of the primers for qPCR.

| <b>Genes</b>   | <b>Forward primer (5'-3')</b> | <b>Reverse primer (5'-3')</b> |
|----------------|-------------------------------|-------------------------------|
| $\beta$ -actin | TACAGCTTCACCACCACAGC          | TCTCCAGGGAGGAAGAGGAT          |
| PEPCK          | CTCACTGACTCGGCTTACG           | CCACTGAATGCAGACACTT           |
| AQP7           | TCGGTGCAACTTGGGTTTTG          | CCAGGTCATTCGGCCTAGTG          |
| AP2            | AAGGTGAAGAGCATCATAACCCT       | TCAGCCTTTCATAACACATTCC        |
| SCD1           | ACCTGCCTCTTCGGGATTTT          | GTCGGCGTGTGTTTCTGAGA          |
| LPL            | TGAAAGTGGGTTTTCTGAGTAT        | GGTTAGCCACCGTTTAATATTTG       |
| GLUT4          | CCTTCTATTTGCCGTCCTCC          | TGGCCCTAAGTATTCAAGTTCTG       |
| CPT1b          | TCTTCTCCGACAAACCCTGA          | GAGACGGACACAGATAGCCC          |
| CD36           | CCTCTTCCCGTCAGACTTGTG         | TCGGAGGTGTTGGCTAGTATTT        |
